# Supplementary material for: SNX27-Mediated Recycling of Neuroligin-2 Regulates Inhibitory Signaling
Source: PubMed Central journal article supplement (PMC6899438; doi:10.1016/j.celrep.2019.10.096), 2019-11-26
Supplement: mmc1.pdf [file mmc1.pdf]

**Cell Reports, Volume 29**

**Supplemental Information**

**SNX27-Mediated Recycling  
of Neuroligin-2 Regulates  
Inhibitory Signaling**

**Els F. Halff, Blanka R. Szulc, Flavie Lesept, and Josef T. Kittler**

**Figure S1**

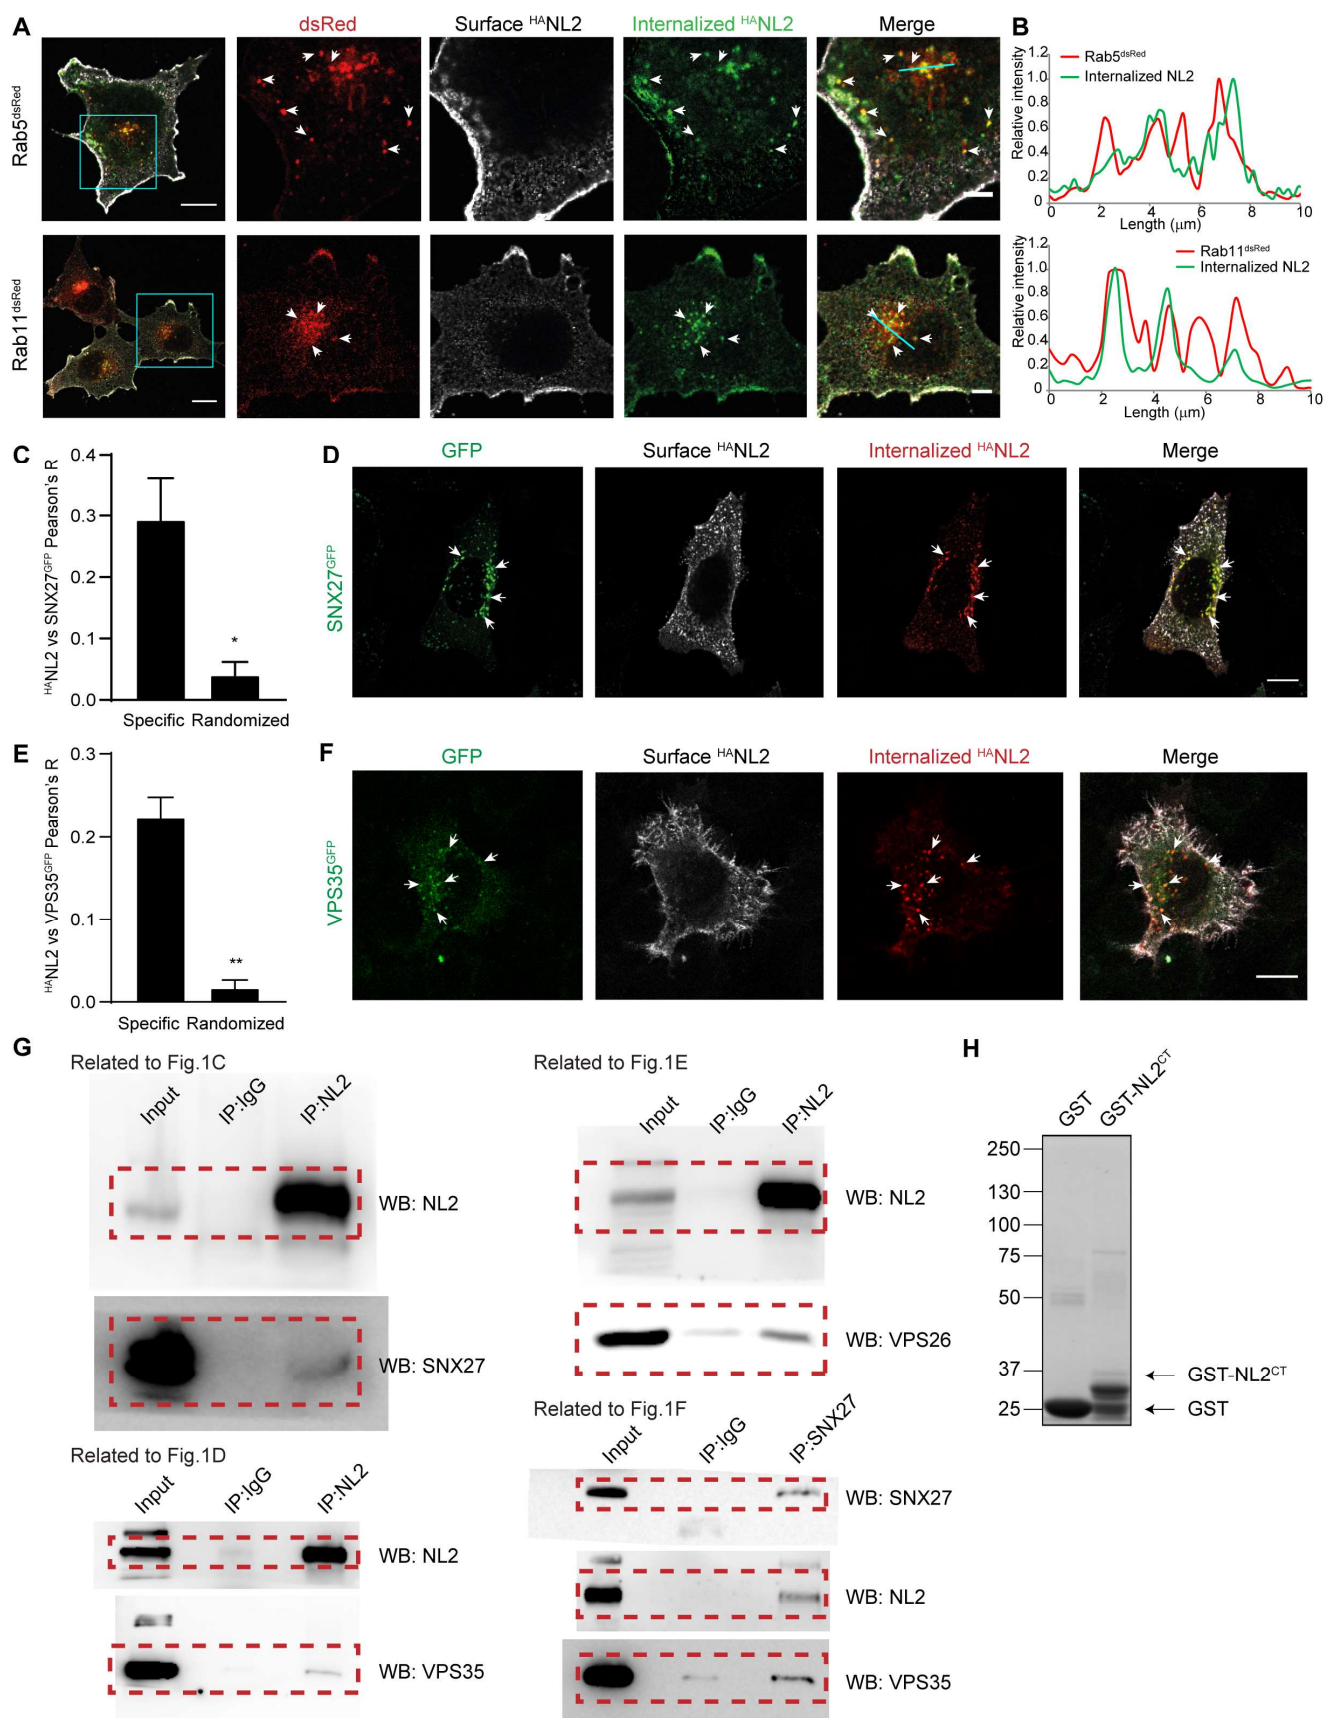

**Figure S1 (related to Figure 1): Internalized NL2 co-localizes and interacts with endosomal markers and recycling complexes. A.** Confocal images of antibody feeding in COS-7 cells showing co-localization of

internalized <sup>HA</sup>NL2 (green) with Rab5<sup>dsRed</sup> (top) or Rab11<sup>dsRed</sup> (bottom, red). Scale bars, 15  $\mu$ m (whole cells) and 5  $\mu$ m (zooms). Arrowheads show examples of co-localization. **B.** Example fluorescent intensity line scans through clusters (corresponding to the lines shown in the merged zoomed images in panel A), showing overlap between internalized <sup>HA</sup>NL2 and Rab5<sup>dsRed</sup> or Rab11<sup>dsRed</sup>. **C.** Pearson's coefficient of co-localization between <sup>HA</sup>NL2 and SNX27<sup>GFP</sup> in neurons (related to Fig.1A; n=4 cells from 2 independent experiments). **D.** Confocal image of antibody feeding in HeLa cells showing co-localization of internalized <sup>HA</sup>NL2 (red) with SNX27<sup>GFP</sup>. Arrowheads show examples of co-localization. Scale bar, 10  $\mu$ m. **E.** Pearson's coefficient of co-localization between <sup>HA</sup>NL2 and VPS35<sup>GFP</sup> in neurons (related to Fig.1B; n=3 cells from 1 experiment). **F.** Confocal image of antibody feeding in HeLa cells showing co-localization of internalized <sup>HA</sup>NL2 (red) with VPS35<sup>GFP</sup>. Arrowheads show examples of co-localization. Scale bar, 10  $\mu$ m. **G.** Full western blots related to the sections of western blots shown in Fig.1C-F. Red boxes indicate the part of the blot that was shown in Fig.1C-F. **H.** Coomassie gel of purified GST and GST-NL2<sup>CT</sup>. Numbers on the left indicate molecular weight in kDa. Values are mean  $\pm$  SEM; \*p<0.05, \*\*p<0.01; paired two-tailed *t*-test.

**Figure S2**

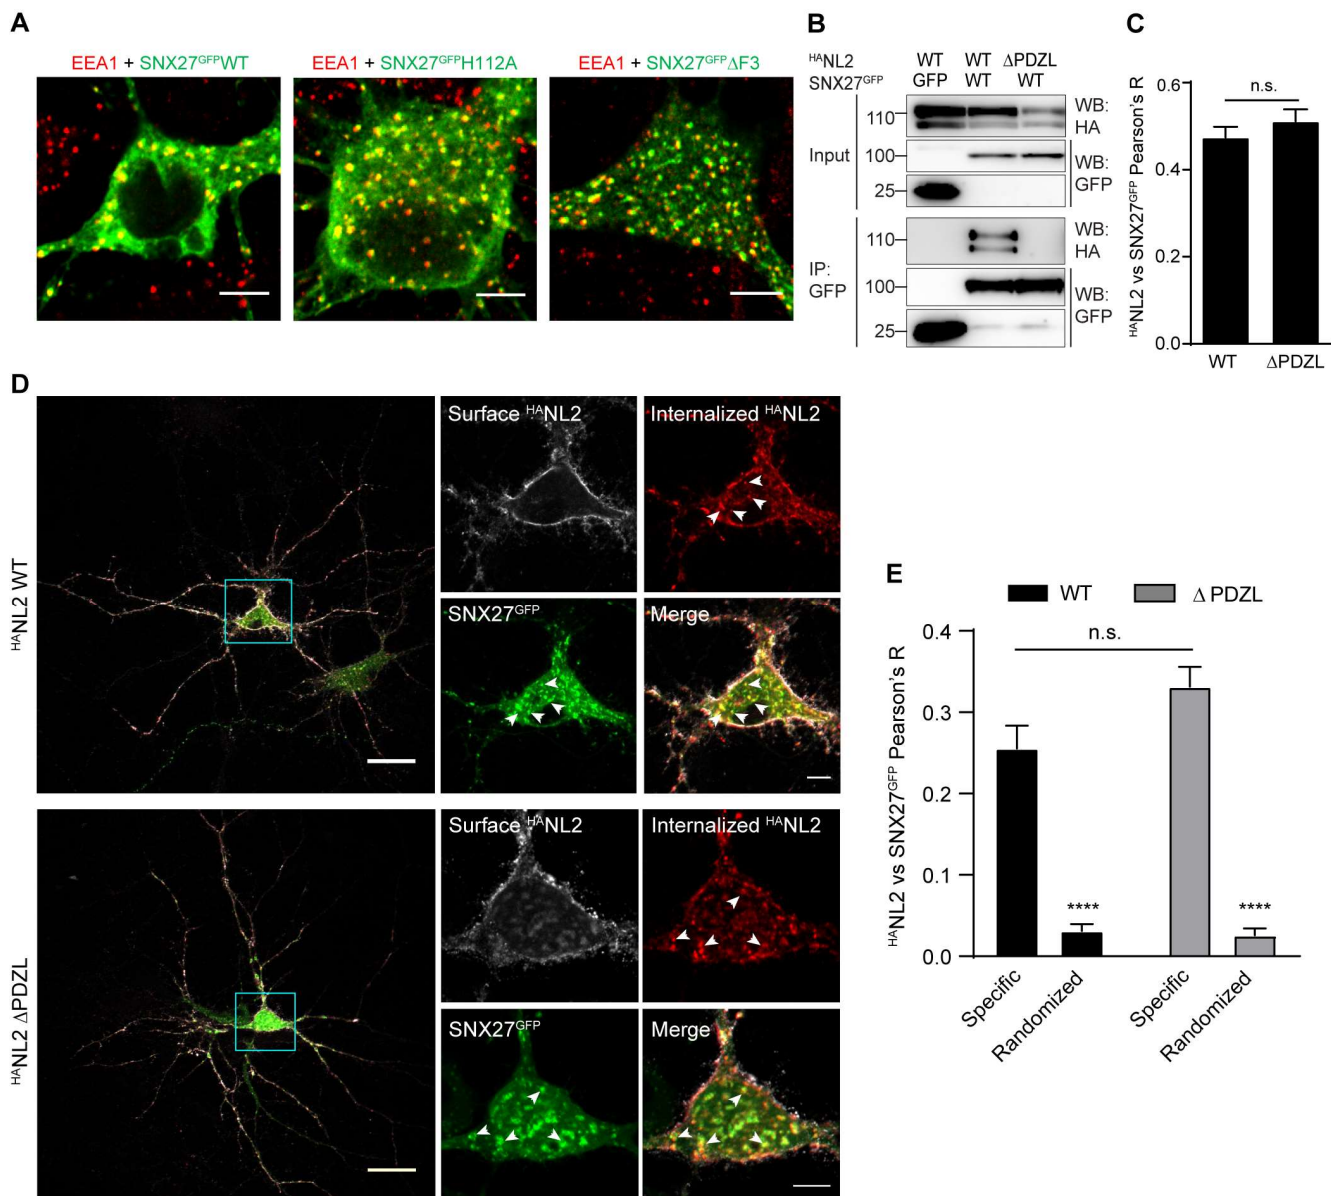

**Figure S2 (related to Figure 2): Abolishing PDZ-ligand interaction between SNX27 and NL2 does not affect endosomal localization of SNX27 and NL2 mutants.** **A.** Confocal images showing co-localization of WT and mutant SNX27<sup>GFP</sup> with Early Endosome Antigen 1 (EEA1) in the soma of hippocampal neurons. Scale bar, 5 μm. **B.** Western blot showing co-immunoprecipitation from COS-7 cells co-expressing GFP-control with <sup>HA</sup>NL2<sup>WT</sup> (first lane) or SNX27<sup>GFP</sup> with <sup>HA</sup>NL2 constructs (second and third lane). GFP and SNX27<sup>GFP</sup> were pulled down using GFP-Trap beads (IP, immunoprecipitation). Numbers on the left indicate molecular weight in kDa. **C.** Pearson's coefficient of co-localization between SNX27<sup>GFP</sup> and <sup>HA</sup>NL2<sup>WT</sup> or <sup>HA</sup>NL2<sup>ΔPDZL</sup> in HeLa cells (related to Fig. 2D; n=15 and 14 cells, respectively, from 2 independent experiments; unpaired two-tailed *t*-test). **D.** Confocal images of antibody feeding in hippocampal neurons showing co-localization of internalised <sup>HA</sup>NL2<sup>WT</sup> or <sup>HA</sup>NL2<sup>ΔPDZL</sup> (red) with SNX27<sup>GFP</sup> (green) in the soma. Arrowheads show examples of co-localization. Scale bars, 25 μm (whole cells) and 5 μm (soma). **E.** Pearson's coefficient of co-localization between <sup>HA</sup>NL2<sup>WT</sup> or <sup>HA</sup>NL2<sup>ΔPDZL</sup> and SNX27<sup>GFP</sup> in neurons (related to Fig.S2D; n=15 and 7 cells, respectively; two-way ANOVA with Bonferroni's correction).

Values are mean ± SEM; n.s. non-significant; \*\*\*\*p<0.0001.

**Figure S3**

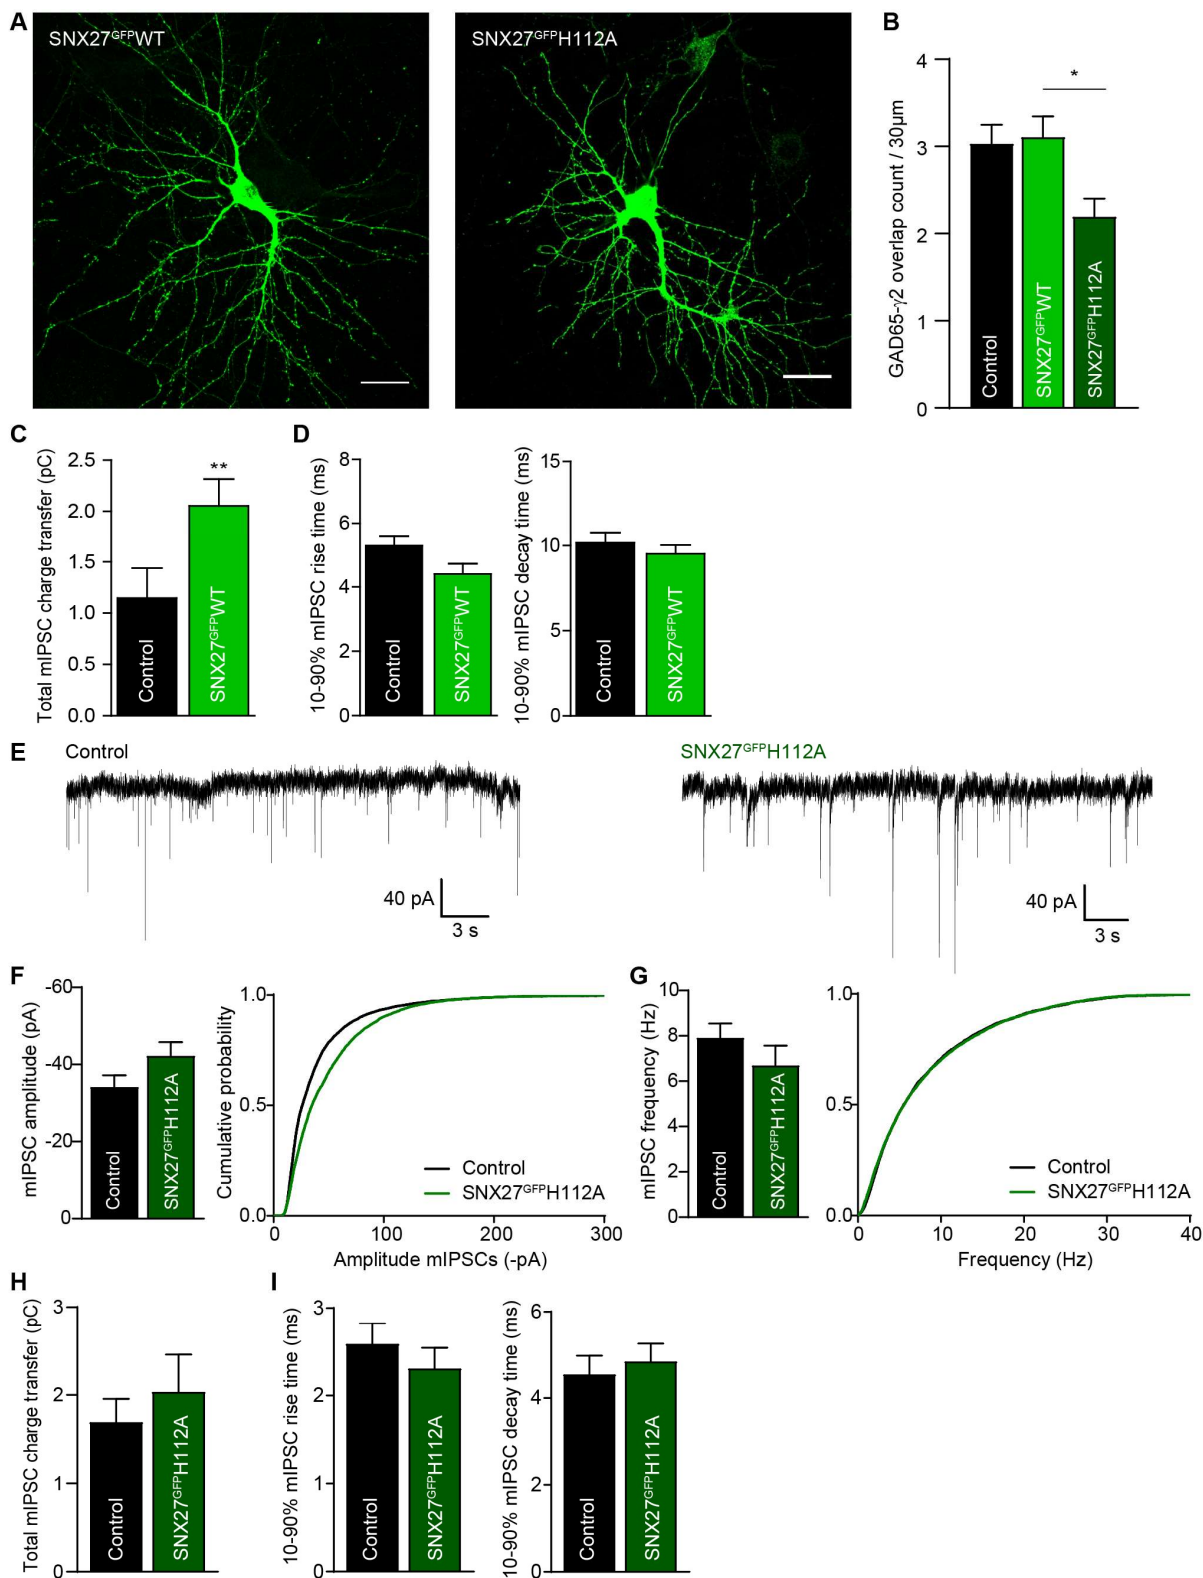

**Figure S3 (related to Figure 3): Overexpression of SNX27<sup>GFP</sup>WT but not SNX27<sup>GFP</sup>H112A affects miniature IPSCs in hippocampal neurons.** **A.** Confocal images of hippocampal neurons overexpressing SNX27<sup>GFP</sup>WT (left) or SNX27<sup>GFP</sup>H112A (right), showing its distribution throughout the neuron. Scale bar, 25  $\mu$ m. **B.** Quantification of overlapping presynaptic GAD65 and postsynaptic  $\gamma$ 2 clusters in hippocampal neurons overexpressing SNX27<sup>GFP</sup>WT, SNX27<sup>GFP</sup>H112A, or mock transfected (Related to Fig.3A-H; n=23,26,24 cells; Kruskal-Wallis test with Dunn's correction). **C.** Total charge transfer calculated for mIPSC of hippocampal

neurons that were mock transfected (Control), or overexpressing SNX27<sup>GFP</sup>WT (WT) (related to Fig.3I-K; n=13 and 22 cells, respectively; Mann-Whitney test). **D.** Kinetics data related to whole-cell patch clamp recordings depicted in Fig. 3I-K. Rise time (Left) and decay time (Right) show no significant difference (n=13 and 22 cells, respectively; unpaired two-tailed *t*-tests). **E.** Representative traces of mIPSC patch-clamp recordings from hippocampal cultures, mock transfected (Control), or overexpressing SNX27<sup>GFP</sup>H112A (H112A). **F-G.** Pooled data (left) and cumulative probability plot (right) of mIPSCs amplitude (**F**) and frequency (**G**) of hippocampal neurons that were mock transfected (Control), or overexpressing SNX27<sup>GFP</sup>H112A (H112A) (n=11 cells each; unpaired two-tailed *t*-tests). **H.** Total charge transfer calculated for mIPSC of hippocampal neurons (related to panel E-G; unpaired one-tailed *t*-test). **I.** Kinetics data related to whole-cell patch clamp recordings depicted in panel E-G: rise time (Left; Mann-Whitney test) and decay time (Right; unpaired two-tailed *t*-test).

Values are mean  $\pm$  SEM; \**p*<0.05, \*\**p*<0.01.

**Figure S4**

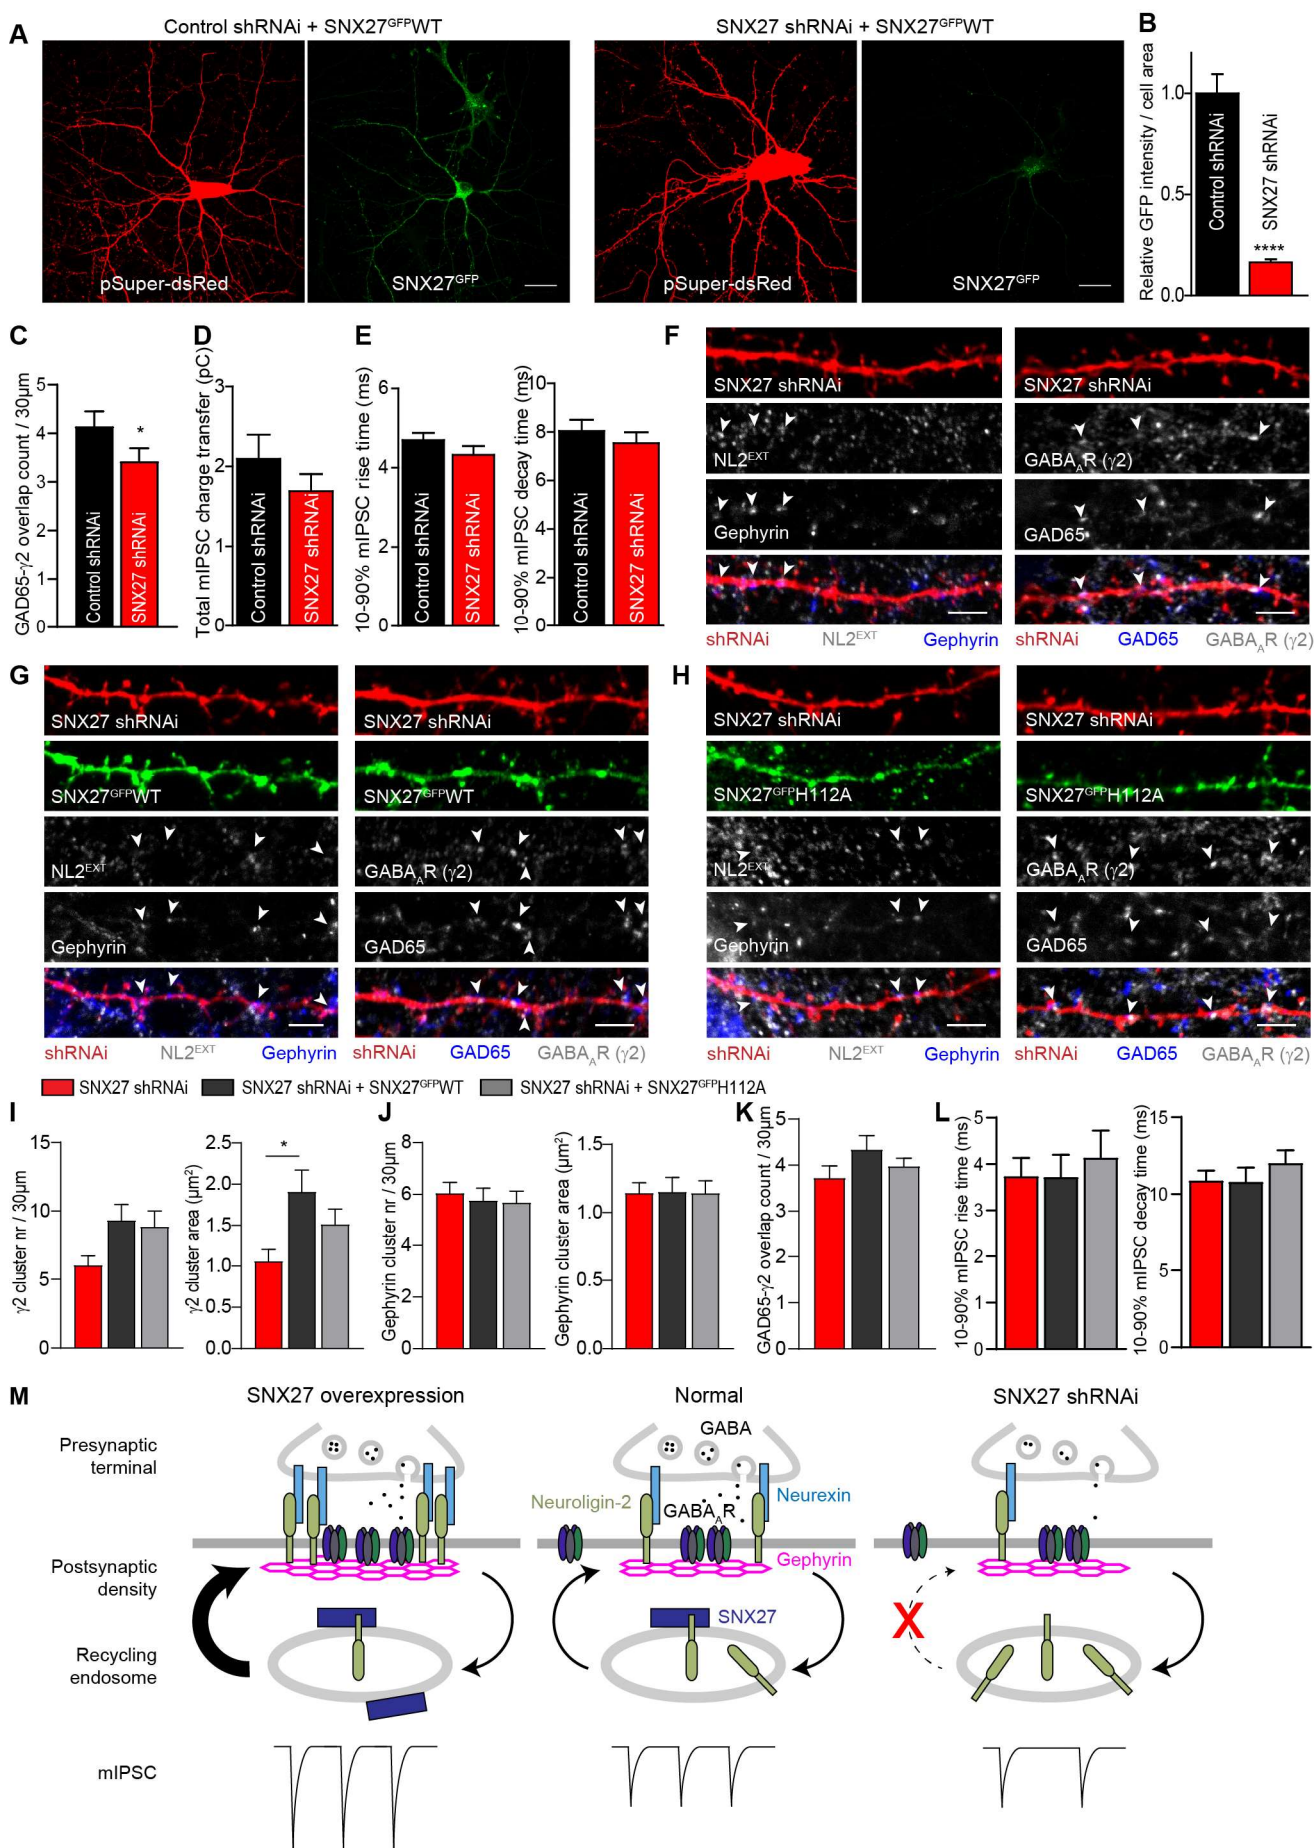

**Figure S4 (related to Figure 4): The effects of SNX27 knockdown can be rescued by SNX27<sup>GFP</sup>WT but not SNX27<sup>GFP</sup>H112A overexpression.** **A.** Confocal images of hippocampal neurons transfected with control or SNX27-specific shRNAi (co-expressing dsRed), combined with murine SNX27<sup>GFP</sup> (green) to assess the efficiency of knockdown. Scale bar, 25  $\mu$ m. **B.** Quantification of relative SNX27<sup>GFP</sup> intensity in hippocampal neurons, transfected as in panel A, shows a 84% decrease in GFP intensity with SNX27-specific shRNAi compared to control shRNAi (n=18 and 22 cells, respectively; unpaired two-tailed *t*-test). **C.** Quantification of overlapping presynaptic GAD65 and postsynaptic  $\gamma$ 2 clusters in hippocampal neurons transfected with control or SNX27-specific shRNAi (related to Fig.4A-G; n=22 and 23 cells, respectively; unpaired one-tailed *t*-test). **D.** Total mIPSC charge transfer calculated for mIPSC of hippocampal neurons transfected with control or SNX27-specific shRNAi (related to Fig.4H-J; n=23 and 20 cells, respectively; unpaired two-tailed *t*-test). **E.** Kinetics data related to whole-cell patch clamp recordings depicted in Fig. 4H-J: rise time (left) and decay time (right) (n=23 and 20 cells, respectively; unpaired two-tailed *t*-tests). **F-H.** Confocal images of 30  $\mu$ m dendritic sections of hippocampal neurons transfected with SNX27 shRNAi only (KD, **F**), or combined with RNAi-resistant SNX27<sup>GFP</sup>WT (KD+WT, **G**) or SNX27<sup>GFP</sup>H112A (KD+H112A, **H**). Neurons were stained for synaptic NL2 (NL2<sup>EXT</sup>), GAD65, gephyrin, and the GABA<sub>A</sub>R  $\gamma$ 2 subunit. Arrowheads show synaptic clusters. Scale bar, 4  $\mu$ m. **I-J.** Quantification of cluster number (left) and area (right) in hippocampal neurons transfected as in panel F-H. Staining is analysed for  $\gamma$ 2 (**I**; n=23,22,24 cells; one-way ANOVA with Bonferroni's correction) and gephyrin (**J**; n=22,24,19 cells; cluster number, Kruskal-Wallis test; cluster area, one-way ANOVA). See Fig.4K-L for quantification of NL2<sup>EXT</sup> and GAD65. **K.** Quantification of overlapping presynaptic GAD65 and postsynaptic  $\gamma$ 2 clusters in hippocampal neurons transfected as in panel F-H (n=23,22,28 cells; one-way ANOVA). **L.** Kinetics of mIPSCs related to whole-cell patch clamp recordings depicted in Fig. 4M-P: rise time (left) and decay time (right) (n=16,15,13 cells; both one-way ANOVA). **M.** Schematic representation of the proposed molecular model, summarizing the data from Fig.3 and Fig.4, and explaining how SNX27-mediated recycling of NL2 modulates inhibitory signaling. Increased SNX27 activity and NL2 recycling enhances stabilization of the postsynaptic scaffold via recruitment of gephyrin and GABA<sub>A</sub>Rs, resulting in increased mIPSC amplitude. SNX27 knockdown and impaired NL2 recycling destabilizes the presynaptic terminal, leading to reduced mIPSC frequency.

Values are mean  $\pm$  SEM; \*=*p*<0.05, \*\*=*p*<0.01, \*\*\*=*p*<0.001, \*\*\*\*=*p*<0.0001.
